# Supplementary material for: A Systematic Literature Review with Meta-Analyses of Within- and Between-Day Differences in Objectively Measured Physical Activity in School-Aged Children
Source: Springer Nature journal article supplement (doi:10.1007/s40279-014-0215-5), 2014-06-30
Supplement: MOESM1 [file 12117618]

## **ELECTRONIC SUPPLEMENTARY MATERIAL**

*A systematic literature review with meta-analyses of within- and between-day differences in objectively measured physical activity in school-aged children*

SPORTS MEDICINE

Hannah L Brooke<sup>1</sup>, Kirsten Corder<sup>1\*</sup>, Andrew J Atkin<sup>1</sup>, Esther M F van Sluijs<sup>1</sup>

<sup>1</sup> *UKCRC Centre for Diet and Activity Research (CEDAR) and MRC Epidemiology Unit, University of Cambridge School of Clinical Medicine, Box 285 Institute of Metabolic Science, Cambridge Biomedical Campus, Cambridge, CB2 0QQ, U.K.*

\*Corresponding Author

Email: [klc29@medschl.cam.ac.uk](mailto:klc29@medschl.cam.ac.uk)

**Electronic Supplementary Material Table S1.** Search strategy conducted in January 2013 of MEDLINE via PubMed, Scopus, Science Citation Index (SCI) via Web of Knowledge, and SPORTDiscus via EBSCOhost limited to papers published post-1990

| Theme              | Keywords                                                                                                                                                                                                                                                                                                                                             | Mesh terms (PubMed only)                                    |
|--------------------|------------------------------------------------------------------------------------------------------------------------------------------------------------------------------------------------------------------------------------------------------------------------------------------------------------------------------------------------------|-------------------------------------------------------------|
| Young people       | Children, child, childhood, adolescence, adolescent, teen, teens, teenaged, teenager, teenagers, "young people", youth, youths, boy, boys, girl, girls, "school aged",                                                                                                                                                                               | "Child", "Adolescent"                                       |
| Physical activity  | "physical activity", "physical activities", exercise, "energy expenditure", sport, sports, "active travel", ("leisure time", AND, activity),                                                                                                                                                                                                         | "Motor Activity", "Sports", "Exercise", "Physical Exertion" |
| Objective measures | Accelerometer, accelerometry, accelerometers, "counts per minute", CPM, triaxial, Actigraph, Yamax, Actiheart, Omron, sensewear, caltrac, walk4life, ideea, actireg, lifecorder, tritrac, genea, stepwatch, actical, actiwatch, rt3, activpal, actimarker, dynaport, CSA, MTI, pedometer, "heart rate", pedometry, pedometers, uniaxial, actigraphy, | "Monitoring, Ambulatory", "Actigraphy"                      |
| Time-segments      | Hour, hours, hourly, day, days, daily, week, weeks, weekly, morning, afternoon, evening, weekday, weekdays, weekend, school, "break time", "play time", recess, lunchtime                                                                                                                                                                            |                                                             |

Themes were combined using AND, keywords were combined using OR. There were no language limitations enforced.

**Electronic Supplementary Material Table S2.** Study by study descriptive characteristics

| Study                         | Year | Study name                 | Country                            | Sample size | Age (years)         | Ethnicity                                    | SES                                          | Meta-analysed | Accelerometer               | Epoch length (seconds) | MVPA cut-point (cpm <sup>a</sup> ) | Minimum registered activity for inclusion (minutes) |          |
|-------------------------------|------|----------------------------|------------------------------------|-------------|---------------------|----------------------------------------------|----------------------------------------------|---------------|-----------------------------|------------------------|------------------------------------|-----------------------------------------------------|----------|
|                               |      |                            |                                    |             |                     |                                              |                                              |               |                             |                        |                                    | Week days                                           | Weekends |
| Aibar, et al.[1]              | 2013 | EPAPA                      | France and Spain                   | 301         | 14 to 15            |                                              | Low to medium                                | Yes           | Actigraph, GT3X             | 15                     | 2296                               | 600                                                 | 480      |
| Alhassan, et al.[2]           | 2008 | GEMS                       | USA                                | 293         | 8 to 10             | Majority other than white - African American | Low                                          | Yes           | Actigraph, model not stated | 60                     | 3000                               | 585                                                 | 330      |
| Aznar, et al.[3]              | 2011 |                            | Spain                              | 221         | 9 and 15            |                                              |                                              | Yes           | Actigraph, GT1M             | 15                     | 2000                               | 600                                                 | 600      |
| Basterfield, et al.[4]        | 2011 | Gateshead Millennium Study | Britain                            | 291         | 6 to 8              |                                              |                                              | No            | Actigraph, GT1M             | NR                     | 3200                               | 360                                                 | 360      |
| Bringolf-Isler, et al.[5]     | 2009 | SCARPOL                    | Switzerland                        | 169         | 6 to 14             |                                              | Medium to high                               | Yes           | CSA/MTI, 7164               | 60                     | 1950                               | 480                                                 | 480      |
| Carver, et al.[6]             | 2008 | CLAN                       | Australia                          | 534         | 8 to 9 and 13 to 15 |                                              | Medium to high                               | Yes           | CSA/MTI, 7164               | 60                     | Age specific                       | 167                                                 | 167      |
| Cooper, et al.[7]             | 2003 |                            | Britain                            | 114         | 9 to 10             |                                              | Low                                          | Yes           | CSA/MTI, 7164               | 60                     | Age specific                       | 720                                                 | 600      |
| De Meester, et al.[8]         | 2011 |                            | Belgium                            | 513         | 13 to 15            |                                              | High                                         | Yes           | Actigraph, GT1M             | 60                     | 3200                               | 600                                                 | 480      |
| Deforche, et al.[9]           | 2009 |                            | Belgium                            | 97          | 6 to 10             |                                              |                                              | No            | CSA/MTI, 7164               | 60                     | 2000                               | 600                                                 | 600      |
| Edwardson, et al.[10]         | 2013 |                            | Britain                            | 136         | 12 to 16            | Majority white                               | Medium to high                               | Yes           | Actigraph, GT1M             | 5                      | Age specific                       | 252 <sup>b</sup>                                    | 540      |
| Esliger, et al.[11]           | 2010 |                            | Canada                             | 413         | 8 to 13             |                                              |                                              | No            | CSA/MTI, 7164               | 60                     | Age specific                       | 600                                                 | 600      |
| Fairclough, et al.[12]        | 2007 |                            | Britain                            | 58          | 7 to 11             |                                              |                                              | Yes           | Actigraph, GT1M             | 5                      | 1956                               | 600                                                 | NA       |
| Fairclough, et al.[13]        | 2012 |                            | Britain                            | 175         | 10 to 11            |                                              | Medium to high                               | Yes           | Actigraph, GT1M             | 5                      | 2000                               | 629                                                 | 605      |
| Ford, et al.[14]              | 2007 |                            | Britain                            | 239         | 5 to 11             |                                              |                                              | Yes           | CSA/MTI, 7164               | 60                     | NA                                 | 720                                                 | 600      |
| Frömel, et al.[15]            | 2012 |                            | Poland                             | 497         | 16 to 18            |                                              |                                              | No            | Actigraph, GT1M             | 60                     | 1951                               | 600                                                 | 600      |
| Frömel, et al.[16]            | 2008 |                            | Poland                             | 244         | 7 to 8              |                                              |                                              | No            | Caltrac                     | NR                     | NA                                 | NR                                                  | NR       |
| Fuemmeler et al.,[17]         | 2011 |                            | USA                                | 45          | 9 to 11             | Majority white                               | Medium to high                               | Yes           | CSA/MTI, 7164               | 60                     | Age specific                       | 600                                                 | 600      |
| Generelo, et al.[18]          | 2011 |                            | Spain                              | 104         | 11 to 15            |                                              |                                              | Yes           | Actigraph, GT1M             | 60                     | Age specific                       | 600                                                 | 480      |
| Gidlow, et al.[19]            | 2008 | CHAMPS                     | Britain                            | 446         | 5 to 16             | Majority white                               | Low                                          | Yes           | Actigraph, GT1M             | 60                     | Age specific                       | 600                                                 | 480      |
| Godard, et al.[20]            | 2012 | INTA                       | Chile                              | 109         | 4 to 10             |                                              |                                              | No            | Actiwatch AW64              | NR                     | 900                                | 450                                                 | 450      |
| Jago, et al.[21]              | 2010 | Bristol 3Ps                | Britain                            | 952         | 10 to 11            |                                              | Other - IMD score 20.73 ± 16.52              | Yes           | Actigraph, GT1M             | NR                     | 2912                               | 500                                                 | 500      |
| Jáuregui, et al.[22]          | 2011 |                            | Mexico                             | 217         | 6 to 7              |                                              | Low - medium                                 | Both          | RT3                         | 60                     | 970                                | 600                                                 | 600      |
| Jürisson, et al.[23]          | 1996 |                            |                                    | 24          | 10 to 13            |                                              |                                              | No            | Caltrac                     | NR                     | NR                                 | NR                                                  | NR       |
| Kemp, et al.[24]              | 2011 |                            | South Africa                       | 24          | 9 to 12             | Majority white                               |                                              | No            | Actical                     | NR                     | 2.7 <sup>c</sup>                   | NR                                                  | NR       |
| Kolle, et al.[25]             | 2010 |                            | Norway                             | 1824        | 9 and 15            |                                              |                                              | Yes           | CSA/MTI, 7164               | 10                     | 2000                               | 480                                                 | 480      |
| Konharn, et al.[26]           | 2012 |                            | Thailand                           | 186         | 13 to 18            |                                              |                                              | Yes           | Actigraph, GT1M             | 30                     | Age specific                       | 600                                                 | 600      |
| Kriemler, et al.[27]          | 2010 |                            | Switzerland                        | 352         | 6 to 12             |                                              | Other - 9% with no formal parental education | Yes           | CSA/MTI, 7164               | 60                     | 2000                               | 720                                                 | NA       |
| Lin, et al.,[28]              | 2012 |                            | Taiwan                             | 36          | 8 to 10             |                                              |                                              | Yes           | Actigraph, GT1M             | NR                     | Age specific                       | NR                                                  | NR       |
| Machado-Rodrigues, et al.[29] | 2012 | MALS                       | Portuguese                         | 362         | 13 to 16            |                                              | Medium to high                               | Yes           | Actigraph, GT1M             | 60                     | Age specific                       | 600                                                 | 600      |
| McLure, et al.[30]            | 2009 |                            | Britain                            | 246         | 9 to 10             |                                              | Low to medium                                | Yes           | Actigraph, GT-256           | 60                     | 1100                               | 180                                                 | 180      |
| McManus, et al.[31]           | 2011 |                            | Hong Kong                          | 84          | 7 to 9              |                                              |                                              | No            | RT3                         | 1                      | 1860                               | NR                                                  | NR       |
| Miller, et al.[32]            | 2013 | SRTS initiative            | USA                                | 193         | 6 to 12             |                                              |                                              | Yes           | Actical                     | 60                     | NA                                 | NR                                                  | NA       |
| Nader, et al.[33]             | 2008 | NICHD SECC                 | USA                                | 839         | 9                   | Majority white                               | Other - 24% low family income                | Yes           | CSA, model not stated       | 60                     | Age specific                       | NR                                                  | NR       |
| Nilsson, et al.[34]           | 2009 | EYHS                       | Denmark, Portugal, Estonia, Norway | 1954        | 9 and 15            |                                              |                                              | Yes           | CSA/MTI, 7164               | 60                     | 2000                               | 600                                                 | 600      |

**Electronic Supplementary Material Table S2. Study by study descriptive characteristics continued**

| Study                  | Year | Study name                        | Country     | Sample size | Age (years)  | Ethnicity                                    | SES                             | Meta-analysed | Accelerometer             | Epoch length (seconds) | MVPA cut-point (cpm <sup>a</sup> ) | Minimum registered activity for inclusion (minutes) |                  |
|------------------------|------|-----------------------------------|-------------|-------------|--------------|----------------------------------------------|---------------------------------|---------------|---------------------------|------------------------|------------------------------------|-----------------------------------------------------|------------------|
|                        |      |                                   |             |             |              |                                              |                                 |               |                           |                        |                                    | Week days                                           | Weekends         |
| Owen, et al.[35]       | 2012 | CHASE                             | Britain     | 2035        | 9 to 10      | Mixed                                        |                                 | Yes           | Actigraph, GT1M           | 5                      | 2000                               | 600                                                 | 600              |
| Page, et al.[36]       | 2009 | PEACH                             | Britain     | 1300        | 10 to 11     |                                              | Other - IMD score 27.29 ± 17.84 | Yes           | Actigraph, GT1M           | 10                     | NA                                 | 480                                                 | 480              |
| Panter, et al.[37]     | 2011 | SPEEDY                            | Britain     | 1824        | 9 to 10      |                                              | Low to medium                   | Yes           | Actigraph, GT1M           | 5                      | 2000                               | 500                                                 | 500              |
| Ridgers, et al.[38]    | 2010 | A-CLASS Project                   | Britain     | 110         | 9 to 10      |                                              |                                 | Yes           | Actigraph, GT1M           | 5                      | Individually calibrated            | 540                                                 | 540              |
| Rowlands, et al.[39]   | 2008 |                                   | Britain     | 84          | 9 to 11      |                                              |                                 | No            | Actigraph, GT1M           | 2                      | 1950                               | 600                                                 | 480              |
| Rush, et al.[40]       | 2012 |                                   | New Zealand | 47          | 8 to 11      |                                              | Low                             | No            | Actical                   | 15                     | 1500                               | NR                                                  | NA               |
| Sherar, et al.[41]     | 2009 |                                   | Canada      | 77          | 9 to 14      |                                              | Medium to high                  | No            | Actical                   | 15                     | 2300                               | 600                                                 | 600              |
| Silva, et al.[42]      | 2011 |                                   | Portuguese  | 24          | 10 to 13     |                                              |                                 | No            | CSA/MTI, 7164             | 60                     | Age specific                       | 480                                                 | NA               |
| Sirard, et al.[43]     | 2008 | Team COOL                         | USA         | 65          | 14 to 17     | Majority other than white - African American | Low                             | Yes           | Actigraph, GT1M           | 30                     | Age specific                       | 600                                                 | 600              |
| Soric, et al.[44]      | 2010 |                                   | Croatia     | 91          | 10.5 to 11.5 |                                              |                                 | No            | SenseWear Armband         | 60                     | 3 <sup>c</sup>                     | 1260                                                | 1260             |
| Stone, et al.[45]      | 2013 | BEAT                              | Canada      | 856         | 10 to 12     |                                              |                                 | Yes           | Actigraph, GT1M           | NR                     | 4242                               | 600                                                 | 600              |
| Stone, et al.[46]      | 2009 |                                   | Britain     | 47          | 8 to 10      |                                              |                                 | No            | Actigraph, GT1M           | 2                      | 3581                               | 600                                                 | 600              |
| Sulemana, et al.[47]   | 2006 |                                   | USA         | 172         | 14 to 17     | Mixed                                        |                                 | Yes           | Actigraphy                | 60                     | NA                                 | NR                                                  | NA               |
| Taylor, et al.[48]     | 2011 | PLAY                              | New Zealand | 427         | 5 to 13      | Majority white                               | Medium to high                  | Yes           | Actigraph, GT3X           | 60                     | 1500                               | 480                                                 | NA               |
| Treuth, et al.[49]     | 2007 | TAAG                              | USA         | 1577        | 11 to 12     | Mixed                                        |                                 | Yes           | CSA/MTI, 7165             | 30                     | 1500                               | 360 <sup>d</sup>                                    | 360 <sup>d</sup> |
| Trost, et al.[50]      | 2000 | Amherst Health and Activity study | USA         | 381         | 6 to 12      | Majority white                               |                                 | No            | CSA/MTI, 7164             | 60                     | Age specific                       | NR                                                  | NR               |
| Uvacsek, et al.[51]    | 2011 |                                   | Hungary     | 53          | 9 to 13      |                                              | High                            | Yes           | CSA/MTI, 7164             | 5                      | 2000                               | 671                                                 | 575              |
| van Sluijs, et al.[52] | 2009 | ALSPAC                            | Britain     | 4688        | 11           | Majority white                               |                                 | Yes           | CSA/MTI, 7164             | 60                     | 3600                               | 600                                                 | 600              |
| Veitch, et al.[53]     | 2010 | CLASS                             | Australia   | 173         | 8 to 9       |                                              | Other - varying                 | Yes           | CSA/MTI, 7164             | 60                     | Unclear                            | 167                                                 | 167              |
| Wilkin, et al.[54]     | 2006 |                                   | Britain     | 431         | 4 to 10      |                                              |                                 | No            | CSA/MTI, model not stated | 60                     | 1000                               | NR                                                  | NR               |

<sup>a</sup> If cut-point was reported per epoch length the per minute equivalent was calculated. NR, not reported; NA, not applicable eg. study only measured physical activity on weekdays; SES, socioeconomic status; MVPA, moderate-to-vigorous intensity physical activity; CSA, computer science applications; MTI, manufacturing technologies Inc, <sup>b</sup> valid after-school period; <sup>c</sup> reported as Metabolic equivalents as this was the measure reported by the monitor, <sup>d</sup> at least one day of seven with 360 minutes of data was required

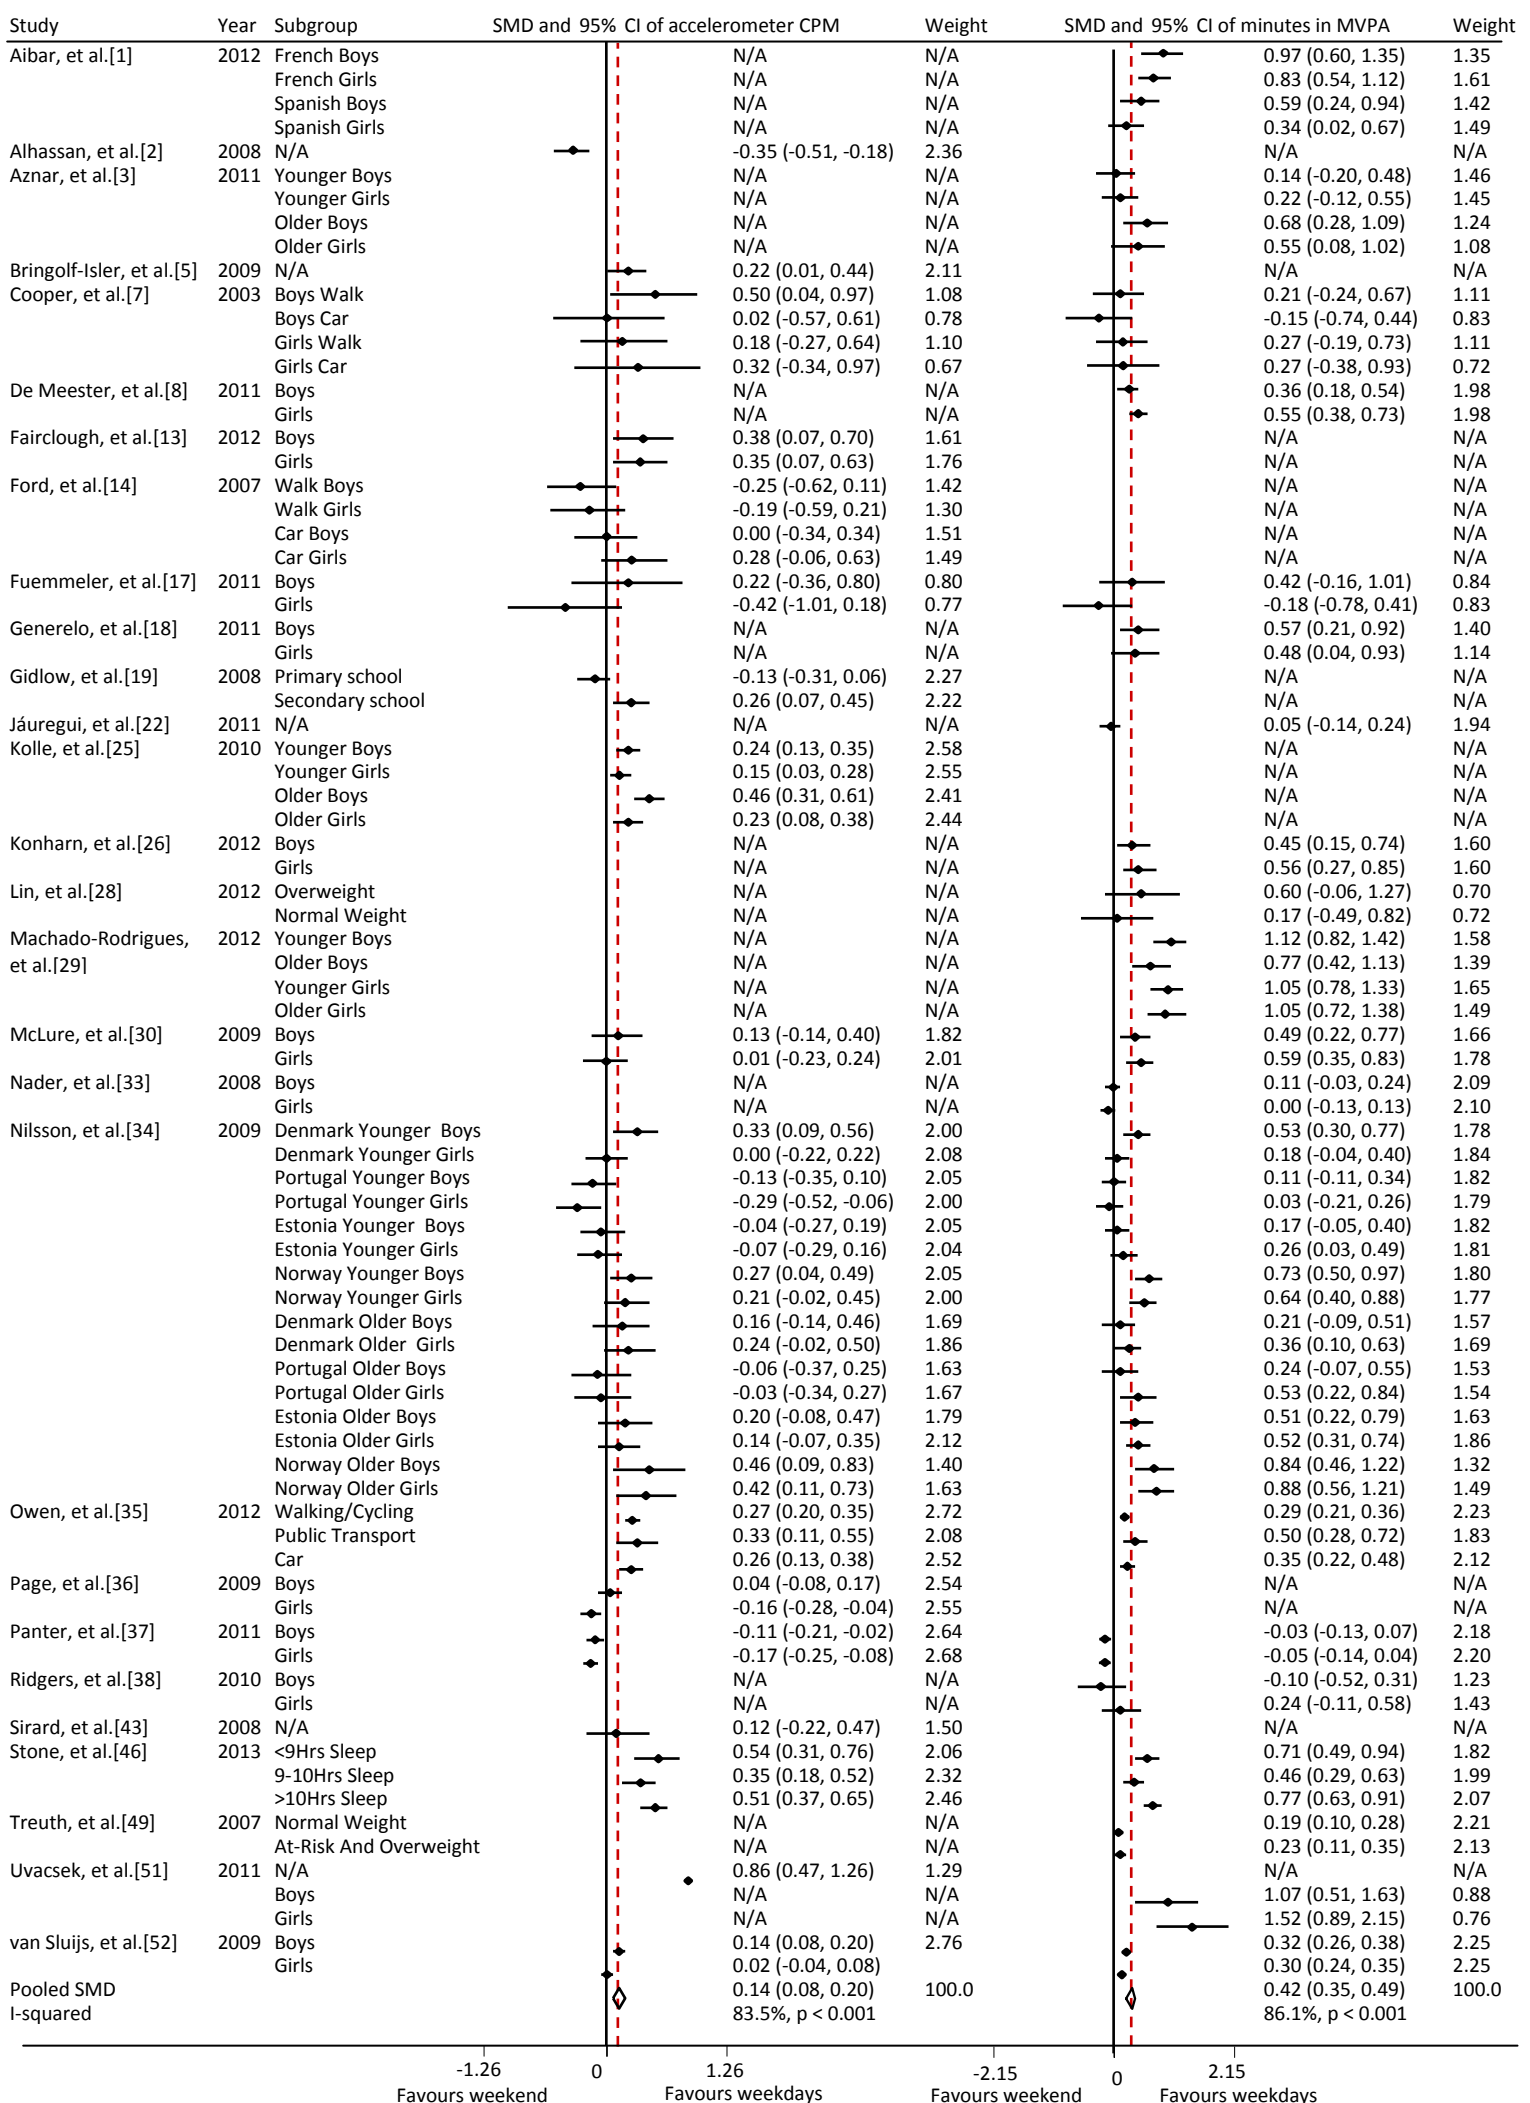

**Electronic Supplementary Material Figure S1.** Forest plots showing standardised mean differences (SMD) and 95% confidence intervals (CI) between week day and weekend day physical activity measured by accelerometer in average counts per minute (CPM) and minutes in moderate-to-vigorous intensity physical activity (MVPA). SMD is reported in units of standard deviation; 0.2, 0.5 and 0.8 respectively represent small, moderate and large effects.  $I^2$  is a measure of heterogeneity between studies.

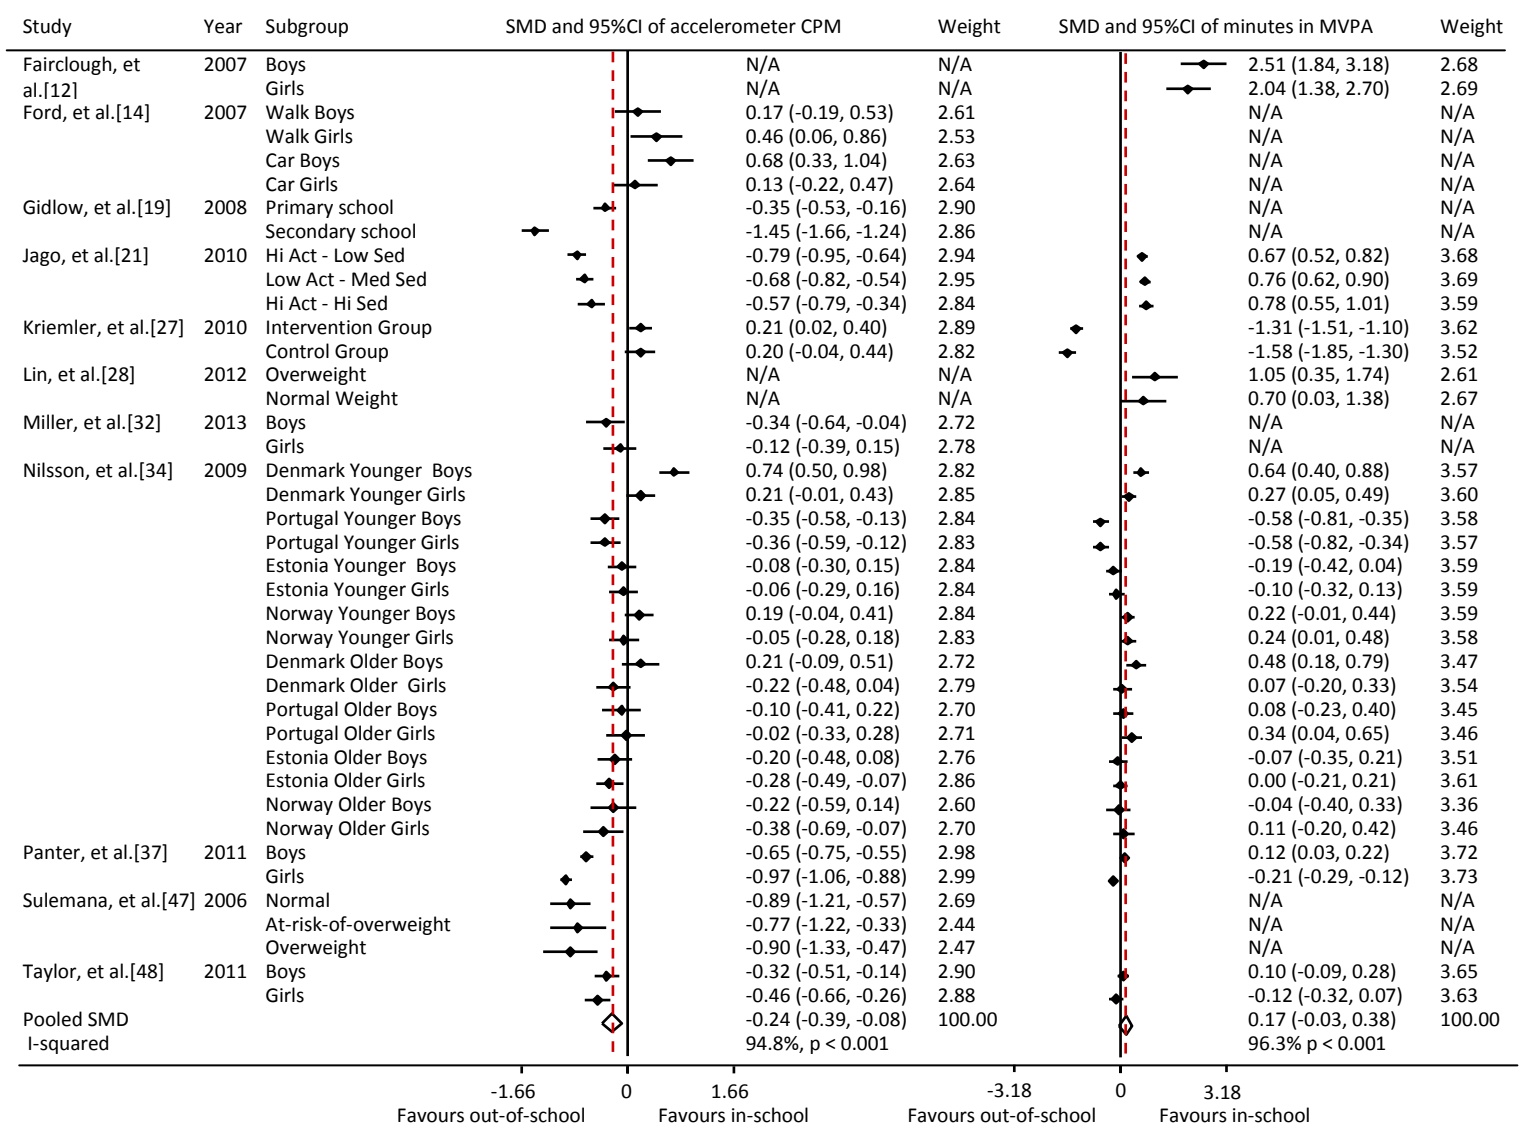

**Electronic Supplementary Material Figure S2.** Forest plots showing standardised mean differences (SMD) and 95% confidence intervals (CI) between in-school and out-of-school physical activity measured by accelerometer in average counts per minute (CPM) and minutes in moderate-to-vigorous intensity physical activity (MVPA). SMD is reported in units of standard deviation; 0.2, 0.5 and 0.8 respectively represent small, moderate and large effects.  $I^2$  is a measure of heterogeneity between studies.

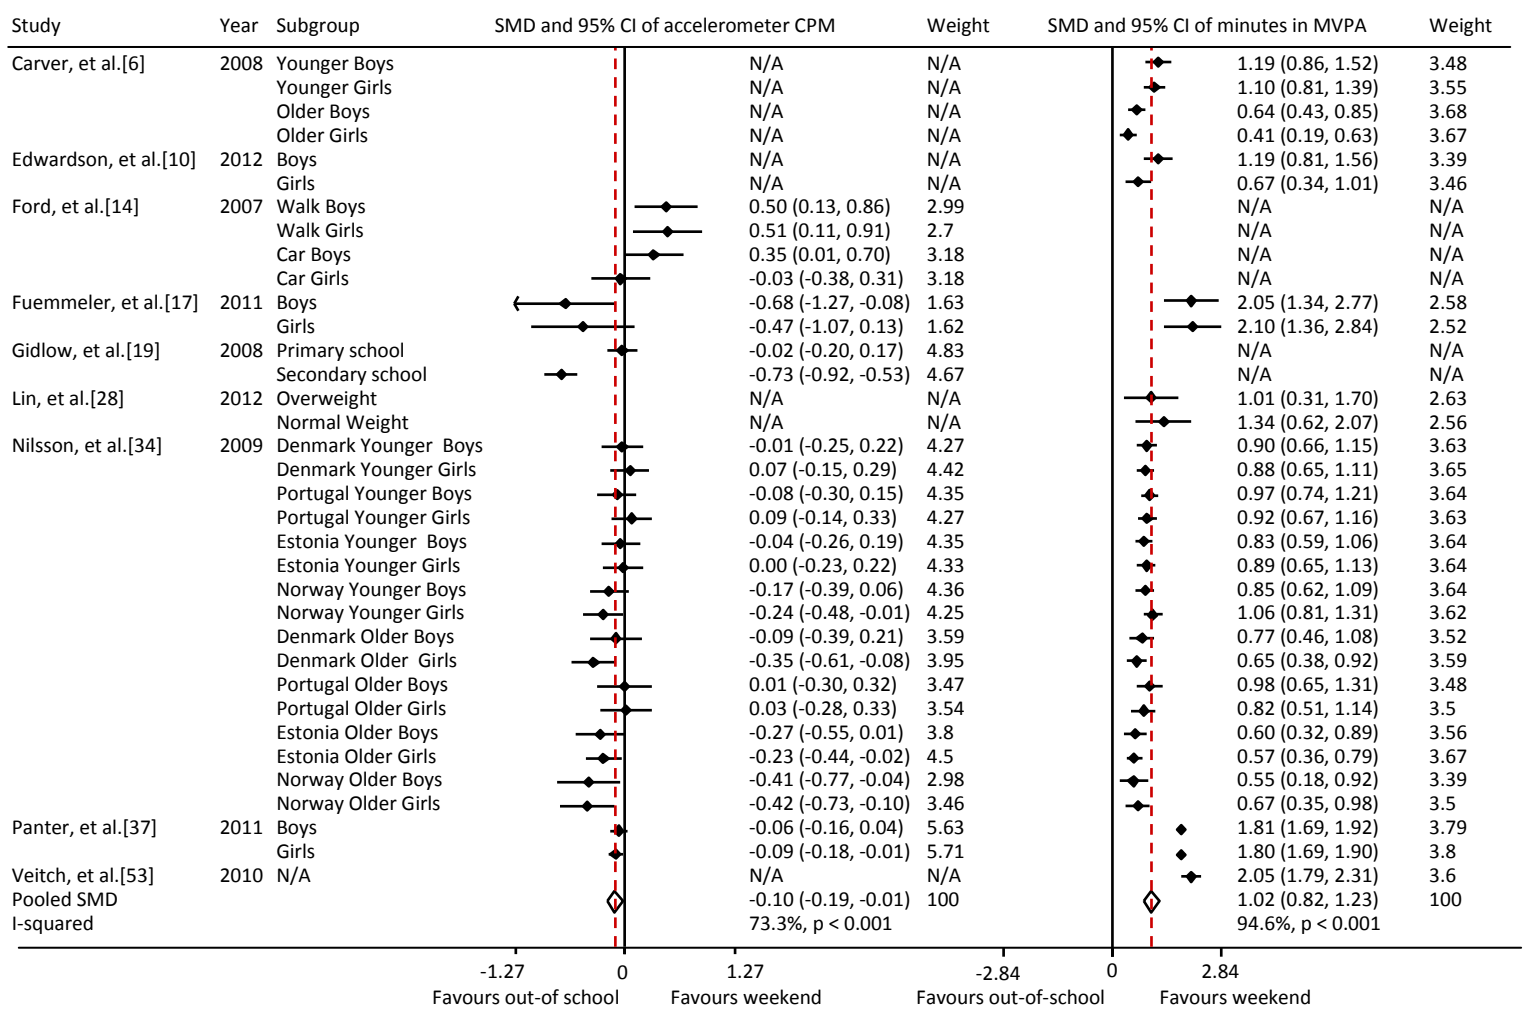

**Electronic Supplementary Material Figure S3.** Forest plots showing standardised mean differences (SMD) and 95% confidence intervals (CI) between out-of-school and weekend physical activity measured by accelerometer in average counts per minute (CPM) and minutes in moderate-to-vigorous intensity physical activity (MVPA). SMD is reported in units of standard deviation; 0.2, 0.5 and 0.8 respectively represent small, moderate and large effects.  $I^2$  is a measure of heterogeneity between studies.

**Electronic Supplementary Material Table S3a.** Summary of results of meta-regression analyses in univariate models

|               | Weekday vs weekend day |        |        |           |                        | In-school vs out-of-school |        |       |           |                        | Weekend vs out-of-school |        |       |              |                        |       |
|---------------|------------------------|--------|--------|-----------|------------------------|----------------------------|--------|-------|-----------|------------------------|--------------------------|--------|-------|--------------|------------------------|-------|
|               | B Coef.                | 95% CI |        | P - value | Adjusted R-squared (%) | B Coef.                    | 95% CI |       | P - value | Adjusted R-squared (%) | B Coef.                  | 95% CI |       | P - value    | Adjusted R-squared (%) |       |
| TPA           | <b>Age</b>             | 0.03   | -0.001 | 0.05      | 0.061                  | 7.46                       | -0.05  | -0.11 | -0.003    | <b>0.04</b>            | 8.83                     | -0.05  | -0.08 | -0.02        | <b>0.003</b>           | 46.81 |
|               | <b>Gender</b>          | Ref    |        |           |                        |                            | Ref    |       |           |                        |                          | Ref    |       |              |                        |       |
|               | Both                   | Ref    |        |           |                        |                            |        |       |           |                        |                          |        |       |              |                        |       |
|               | Boy                    | -0.17  | -0.33  | -0.009    | <b>0.039</b>           | 25.24                      | 0.46   | 0.04  | 0.89      | <b>0.033</b>           | 9.31                     | 0.31   | -0.09 | 0.70         | 0.124                  | 7.57  |
|               | Girl                   | -0.28  | -0.44  | -0.12     | <b>0.001</b>           |                            | 0.20   | -0.21 | 0.61      | 0.329                  |                          | 0.28   | -0.12 | 0.67         | 0.161                  |       |
|               | <b>Global region</b>   | Ref    |        |           |                        |                            | Ref    |       |           |                        |                          | Ref    |       |              |                        |       |
|               | Europe                 | Ref    |        |           |                        |                            |        |       |           |                        |                          |        |       |              |                        |       |
| North America | 0.06                   | -0.15  | 0.27   | 0.558     | -0.58                  | -0.42                      | -0.89  | 0.05  | 0.077     | 3.16                   | -0.49                    | -1.06  | 0.08  | 0.089        | 6.19                   |       |
| Other         | omitted                |        |        |           |                        | -0.22                      | -0.90  | 0.45  | 0.506     |                        | omitted                  |        |       |              |                        |       |
| MVPA          | <b>Age</b>             | 0.06   | 0.03   | 0.09      | <b>&lt;0.001</b>       | 30.1                       | -0.02  | -0.13 | 0.09      | 0.738                  | -4.26                    | -0.09  | -0.15 | -0.04        | <b>0.002</b>           | 33.05 |
|               | <b>Gender</b>          | Ref    |        |           |                        |                            | Ref    |       |           |                        |                          | Ref    |       |              |                        |       |
|               | Both                   | Ref    |        |           |                        |                            |        |       |           |                        |                          |        |       |              |                        |       |
|               | Boy                    | -0.02  | -0.28  | 0.24      | 0.871                  | -4.75                      | 0.48   | -0.37 | 1.33      | 0.258                  | -3.46                    | -1.04  | -1.91 | -0.17        | <b>0.021</b>           | 20.10 |
|               | Girl                   | -0.02  | -0.28  | 0.24      | 0.876                  |                            | 0.29   | -0.58 | 1.16      | 0.496                  |                          | -1.12  | -1.99 | -0.25        | <b>0.014</b>           |       |
|               | <b>Global region</b>   | Ref    |        |           |                        |                            | Ref    |       |           |                        |                          | Ref    |       |              |                        |       |
|               | Europe                 | Ref    |        |           |                        |                            |        |       |           |                        |                          |        |       |              |                        |       |
| North America | -0.14                  | -0.36  | 0.09   | 0.235     | -1.52                  | 0.23                       | -0.67  | 1.12  | 0.609     | -3.13                  | 1.15                     | 0.34   | 1.95  | <b>0.007</b> | 14.35                  |       |
| Other         | -0.11                  | -0.43  | 0.22   | 0.523     |                        | omitted                    |        |       |           |                        | 0.16                     | -0.23  | 0.55  | 0.408        |                        |       |

TPA, total physical activity; MVPA, moderate-to-vigorous intensity physical activity; B Coef, Beta Coefficient; 95% CI, 95% Confidence interval; Ref, reference category. Bold p - values indicate a significant association of the potential effect modifier (age, gender, and global region of study setting) with the standardised mean difference in physical activity between time-segments. Significantly factors were combined in a multivariate model where appropriate (**Electronic Supplementary Material Table S3b**). Adjusted R-squared indicates the proportion of between-study variance explained by the covariates. Negative adjusted R-squared indicates that the covariates explain less of the heterogeneity than would be expected by chance. In several models global region 'Other' was omitted due to co-linearity.



**Electronic Supplementary Material Table S3b.** Summary of results of meta-regression analyses in multivariate models

|                                |                      | B Coef. | 95% CI |       | P - value | Adjusted R-squared (%) | P-value for joint test of all covariates |
|--------------------------------|----------------------|---------|--------|-------|-----------|------------------------|------------------------------------------|
| In-school vs out-of-school TPA | <b>Age</b>           | -0.06   | -0.11  | -0.01 | 0.023     | 20.33                  | 0.0175                                   |
|                                | <b>Gender</b>        |         |        |       |           |                        |                                          |
|                                | Both                 |         |        |       |           |                        |                                          |
|                                | Boy                  | 0.51    | 0.11   | 0.91  | 0.015     |                        |                                          |
|                                | Girl                 | 0.29    | -0.10  | 0.68  | 0.142     |                        |                                          |
| Weekend vs out-of-school MVPA  | <b>Age</b>           | -0.07   | -0.12  | -0.02 | 0.005     | 53.05                  | 0.0006                                   |
|                                | <b>Gender</b>        |         |        |       |           |                        |                                          |
|                                | Both                 | Ref     |        |       |           |                        |                                          |
|                                | Boy                  | -0.97   | -1.70  | -0.23 | 0.012     |                        |                                          |
|                                | Girl                 | -1.04   | -1.78  | -0.29 | 0.008     |                        |                                          |
|                                | <b>Global region</b> |         |        |       |           |                        |                                          |
|                                | Europe               | Ref     |        |       |           |                        |                                          |
| North America                  | 1.01                 | 0.30    | 1.72   | 0.007 |           |                        |                                          |
| Other                          | -0.13                | -0.46   | 0.21   | 0.437 |           |                        |                                          |

TPA, total physical activity; MVPA, moderate-to-vigorous intensity physical activity; B Coef, Beta Coefficient; 95% CI, 95% Confidence interval; Ref, reference category. Adjusted R-squared indicates the proportion of between-study variance explained by the covariates.

**Electronic Supplementary Material Table S4.** Summary of sensitivity analyses assuming differing degrees of correlation between time-segments

| Outcome | Time-segment comparison | Correlation r=0.0 |                      |       | Correlation r=0.2 |                      |       | Correlation r=0.5 |                      |       | Correlation r=0.8 |                      |       |
|---------|-------------------------|-------------------|----------------------|-------|-------------------|----------------------|-------|-------------------|----------------------|-------|-------------------|----------------------|-------|
|         |                         | Pooled SMD        | 95% CI of pooled SMD |       | Pooled SMD        | 95% CI of pooled SMD |       | Pooled SMD        | 95% CI of pooled SMD |       | Pooled SMD        | 95% CI of pooled SMD |       |
|         |                         |                   | Lower                | Upper |                   | Lower                | Upper |                   | Lower                | Upper |                   | Lower                | Upper |
| TPA     | Weekdays                | 0.14              | 0.08                 | 0.20  | 0.14              | 0.08                 | 0.20  | 0.14              | 0.08                 | 0.20  | 0.14              | 0.09                 | 0.20  |
|         | Weekend                 |                   | Ref                  |       |                   | Ref                  |       |                   | Ref                  |       |                   | Ref                  |       |
| MVPA    | Weekdays                | 0.42              | 0.35                 | 0.49  | 0.41              | 0.35                 | 0.48  | 0.42              | 0.36                 | 0.48  | 0.43              | 0.37                 | 0.49  |
|         | Weekend                 |                   | Ref                  |       |                   | Ref                  |       |                   | Ref                  |       |                   | Ref                  |       |
| TPA     | In-school               | -0.24             | -0.40                | -0.08 | -0.24             | -0.39                | -0.08 | -0.23             | -0.39                | -0.08 | -0.23             | -0.38                | -0.08 |
|         | Out-of-school           |                   | Ref                  |       |                   | Ref                  |       |                   | Ref                  |       |                   | Ref                  |       |
| MVPA    | In-school               | 0.17              | -0.03                | 0.38  | 0.14              | -0.04                | 0.33  | 0.17              | -0.02                | 0.35  | 0.19              | 0.02                 | 0.37  |
|         | Out-of-school           |                   | Ref                  |       |                   | Ref                  |       |                   | Ref                  |       |                   | Ref                  |       |
| TPA     | Weekend                 | -0.10             | -0.19                | -0.01 | -0.10             | -0.19                | -0.02 | -0.10             | -0.18                | -0.02 | -0.10             | -0.18                | -0.02 |
|         | Out-of-school           |                   | Ref                  |       |                   | Ref                  |       |                   | Ref                  |       |                   | Ref                  |       |
| MVPA    | Weekend                 | 1.02              | 0.82                 | 1.23  | 1.01              | 0.82                 | 1.20  | 1.02              | 0.83                 | 1.21  | 1.03              | 0.84                 | 1.22  |
|         | Out-of-school           |                   | Ref                  |       |                   | Ref                  |       |                   | Ref                  |       |                   | Ref                  |       |

TPA, Total physical activity; MVPA, moderate-to-vigorous intensity physical activity; SMD, Standardised mean difference; 95% CI, 95% Confidence interval; Ref, Reference time-segment. SMD is reported in units of standard deviation.

## Electronic Supplementary Material References

1. Aibar A, Bois JE, Generelo E, Zaragoza Casterad J, Paillard T. A cross-cultural study of adolescents' physical activity levels in France and Spain. *Eur J Sport Sci.* 2013;13(5):551-8.
2. Alhassan S, Sirard JR, Spencer TR, Varady A, Robinson TN. Estimating Physical Activity From Incomplete Accelerometer Data in Field Studies. *J Phys Act Health.* 2008;5(Suppl 1):S112-25.
3. Aznar S, Naylor PJ, Silva P, Perez M, Angulo T, Laguna M et al. Patterns of physical activity in Spanish children: a descriptive pilot study. *Child Care Health Dev.* 2011;37(3):322-8.
4. Basterfield L, Adamson AJ, Pearce MS, Reilly JJ. Stability of Habitual Physical Activity and Sedentary Behavior Monitoring by Accelerometry in 6-to 8-Year-Olds. *J Phys Act Health.* 2011;8(4):543-7.
5. Bringolf-Isler B, Grize L, Maeder U, Ruch N, Sennhauser FH, Braun-Fahrlander C. Assessment of intensity, prevalence and duration of everyday activities in Swiss school children: a cross-sectional analysis of accelerometer and diary data. *Int J Behav Nutr Phys Act.* 2009;6:50. doi:10.1186/1479-5868-6-50.
6. Carver A, Timperio AF, Crawford DA. Neighborhood road environments and physical activity among youth: The CLAN study. *J Urban Health.* 2008;85(4):532-44. doi:10.1007/s11524-008-9284-9.
7. Cooper AR, Page AS, Foster LJ, Qahwaji D. Commuting to school - Are children who walk more physically active? *Am J Prev Med.* 2003;25(4):273-6. doi:10.1016/s0749-3797(03)00205-8.
8. De Meester F, De Bourdeaudhuij I, Deforche B, Ottevaere C, Cardon G. Measuring physical activity using accelerometry in 13-15-year-old adolescents: the importance of including non-wear activities. *Public Health Nutr.* 2011;14(12):2124-33. doi:10.1017/s1368980011001868.
9. Deforche B, De Bourdeaudhuij I, D'Hondt E, Cardon G. Objectively measured physical activity, physical activity related personality and body mass index in 6-to 10-yr-old children: a cross-sectional study. *Int J Behav Nutr Phys Act.* 2009;6:25. doi:10.1186/1479-5868-6-25.
10. Edwardson CL, Gorely T, Pearson N, Atkin A. Sources of activity-related social support and adolescents' objectively measured after-school and weekend physical activity: gender and age differences. *J Phys Act Health.* 2013;10(8):1153-8.
11. Eslinger DW, Tremblay MS, Copeland JL, Barnes JD, Huntington GE, Bassett DR, Jr. Physical Activity Profile of Old Order Amish, Mennonite, and Contemporary Children. *Med Sci Sports Exerc.* 2010;42(2):296-303. doi:10.1249/MSS.0b013e3181b3afd2.
12. Fairclough SJ, Butcher ZH, Stratton G. Whole-day and segmented-day physical activity variability of northwest England school children. *Prev Med.* 2007;44(5):421-5. doi:10.1016/j.ypmed.2007.01.002.
13. Fairclough SJ, Ridgers ND, Welk G. Correlates of Children's Moderate and Vigorous Physical Activity During Weekdays and Weekends. *J Phys Act Health.* 2012;9(1):129-37.
14. Ford P, Bailey R, Coleman D, Woolf-May K, Swaine I. Activity levels, dietary energy intake, and body composition in children who walk to school. *Pediatr Exerc Sci.* 2007;19(4):393-407.
15. Frömel K, Pelclová J, Skalík K, Nováková Lokvencová P, Mitáš J. The association between participation in organised physical activity and level of physical activity and inactivity in adolescent girls. *Acta Universitatis Palackianae Olomucensis Gymnica.* 2012;42(1):7-16.
16. Frömel K, Stelzer J, Groffik D, Ernest J. Physical activity of children ages 6-8: The beginning of school attendance. *J Res Child Educ.* 2008;23(1):29-40.

17. Fuemmeler BF, Anderson CB, Masse LC. Parent-child relationship of directly measured physical activity. *Int J Behav Nutr Phys Act.* 2011;8:17. doi:10.1186/1479-5868-8-17.
18. Generelo E, Zaragoza J, Julian JA, Abarca-Sos A, Murillo B. Physical activity patterns in normal-weight adolescents on week-days and week-ends. *J Sports Med Phys Fitness.* 2011;51(4):647-653.
19. Gidlow CJ, Cochrane T, Davey R, Smith H. In-school and out-of-school physical activity in primary and secondary school children. *J Sports Sci.* 2008;26(13):1411-9. doi:10.1080/02640410802277445.
20. Godard C, Roman M, del Pilar Rodriguez M, Leyton B, Salazar G. Variability of physical activity in 4 to 10-year-old children: a study by accelerometry. *Arch Argent Pediatr.* 2012;110(5):388-93. doi:10.5546/aap.2012.388.
21. Jago R, Fox KR, Page AS, Brockman R, Thompson JL. Physical activity and sedentary behaviour typologies of 10-11 year olds. *Int J Behav Nutr Phys Act.* 2010;7:59. doi:1479-5868-7-59
22. Jauregui A, Villalpando S, Rangel-Baltazar E, Castro-Hernandez J, Lara-Zamudio Y, Mendez-Gomez-Humaran I. The physical activity level of Mexican children decreases upon entry to elementary school. *Salud Publica Mex.* 2011;53(3):228-236.
23. Jurisson A, Jurimae T. The validity of the Godin-Shephard physical activity questionnaire in children. *Biol Sport.* 1996;13(4):291-5.
24. Kemp C, Pienaar AE. Physical activity levels and energy expenditure of 9-year-old - 12-year-old overweight and obese children. *Health SA Gesondheid.* 2011;16(1):557. doi:10.4102/hsag.v16i1.557
25. Kolle E, Steene-Johannessen J, Andersen LB, Anderssen SA. Objectively assessed physical activity and aerobic fitness in a population-based sample of Norwegian 9- and 15-year-olds. *Scand J Med Sci Sports.* 2010;20(1):e41-7. doi:10.1111/j.1600-0838.2009.00892.x.
26. Konharn K, Santos MP, Ribeiro JC. Differences Between Weekday and Weekend Levels of Moderate-to-Vigorous Physical Activity in Thai Adolescents. *Asia Pac J Public Health.* 2012. doi:10.1177/1010539512459946.
27. Kriemler S, Zahner L, Schindler C, Meyer U, Hartmann T, Hebestreit H et al. Effect of school based physical activity programme (KISS) on fitness and adiposity in primary schoolchildren: cluster randomised controlled trial. *BMJ.* 2010;340:c785. doi:10.1136/bmj.c785.
28. Lin C-Y, Su C-T, Ma H-I. Physical Activity Patterns and Quality of Life of Overweight Boys: A Preliminary Study. *Hong Kong J Occupational Therapy.* 2012;22(1):31-7. doi:10.1016/j.hkjot.2012.06.001.
29. Machado-Rodrigues AM, Coelho ESMJ, Mota J, Padez C, Martins RA, Cumming SP et al. Urban-rural contrasts in fitness, physical activity, and sedentary behaviour in adolescents. *Health Promot Int.* 2012. doi:10.1093/heapro/das054.
30. McLure SA, Summerbell CD, Reilly JJ. Objectively measured habitual physical activity in a highly obesogenic environment. *Child Care Health Dev.* 2009;35(3):369-75. doi:10.1111/j.1365-2214.2009.00946.x.
31. McManus AM, Chu EYW, Yu CCW, Hu Y. How children move: activity pattern characteristics in lean and obese chinese children. *J Obes.* 2011;2011:679328. doi:10.1155/2011/679328.
32. Miller WC, Redmond JG, Vaux-Bjerke AT. Activity Patterns and Perceptions About Active Transport to School. *Am J Health Behav.* 2013;37(2):190-8. doi:10.5993/ajhb.37.2.6.
33. Nader PR, Bradley RH, Houts RM, McRitchie SL, O'Brien M. Moderate-to-vigorous physical activity from ages 9 to 15 years. *JAMA.* 2008;300(3):295-305. doi:300/3/295

34. Nilsson A, Anderssen SA, Andersen LB, Froberg K, Riddoch C, Sardinha LB et al. Between- and within-day variability in physical activity and inactivity in 9-and 15-year-old European children. *Scand J Med Sci Sports*. 2009;19(1):10-8. doi:10.1111/j.1600-0838.2007.00762.x.
35. Owen CG, Nightingale CM, Rudnicka AR, van Sluijs EMF, Ekelund U, Cook DG et al. Travel to School and Physical Activity Levels in 9-10 Year-Old UK Children of Different Ethnic Origin; Child Heart and Health Study in England (CHASE). *Plos One*. 2012;7(2)e30932. doi:10.1371/journal.pone.0030932.
36. Page AS, Cooper AR, Griew P, Davis L, Hillsdon M. Independent mobility in relation to weekday and weekend physical activity in children aged 10-11 years: The PEACH Project. *Int J Behav Nutr Phys Act*. 2009;6:2. doi:10.1186/1479-5868-6-2.
37. Panter J, Jones A, Van Sluijs E, Griffin S. The Influence of Distance to School on the Associations Between Active Commuting and Physical Activity. *Pediatr Exerc Sci*. 2011;23(1):72-86.
38. Ridgers ND, Graves LEF, Fowweather L, Stratton G. Examining Influences on Boy's and Girls' Physical Activity Patterns: The A-CLASS Project. *Pediatr Exerc Sci*. 2010;22(4):638-50.
39. Rowlands AV, Pilgrim EL, Eston RG. Patterns of habitual activity across weekdays and weekend days in 9-11-year-old children. *Prev Med*. 2008;46(4):317-24. doi:10.1016/j.ypmed.2007.11.004.
40. Rush E, Coppinger T, Obolonkin V, Hinckson E, McGrath L, McLennan S et al. Use of pedometers to identify less active children and time spent in moderate to vigorous physical activity in the school setting. *J Sci Med Sport*. 2012;15(3):226-30. doi:10.1016/j.jsams.2011.11.001.
41. Sherar LB, Muhajarine N, Esliger DW, Baxter-Jones ADG. The relationship between girls' (8-14 years) physical activity and maternal education. *Ann Hum Biol*. 2009;36(5):573-83. doi:10.1080/03014460903071151.
42. Silva P, Rute S, Welk G, Mota J. Seasonal differences in physical activity and sedentary patterns: The relevance of the PA context. *J Sports Sci Med*. 2011;10(1):66-72.
43. Sirard JR, Kubik MY, Fulkerson JA, Arcan C. Objectively Measured Physical Activity in Urban Alternative High School Students. *Med Sci Sports Exerc*. 2008;40(12):2088-95. doi:10.1249/MSS.0b013e318182092b.
44. Soric M, Misigoj-Durakovic M. Physical activity levels and estimated energy expenditure in overweight and normal-weight 11-year-old children. *Acta Paediatr*. 2010;99(2):244-50. doi:10.1111/j.1651-2227.2009.01553.x.
45. Stone MR, Stevens D, Faulkner GEJ. Maintaining recommended sleep throughout the week is associated with increased physical activity in children. *Prev Med*. 2013;56(2):112-7. doi:10.1016/j.ypmed.2012.11.015.
46. Stone MR, Rowlands AV, Eston RG. Characteristics of the activity pattern in normal weight and overweight boys. *Prev Med*. 2009;49(2-3):205-8. doi:10.1016/j.ypmed.2009.06.012.
47. Sulemana H, Smolensky MH, Lai DJ. Relationship between physical activity and body mass index in adolescents. *Med Sci Sports Exerc*. 2006;38(6):1182-6. doi:10.1249/01.mss.0000222847.35004.a5.
48. Taylor RW, Farmer VL, Cameron SL, Meredith-Jones K, Williams SM, Mann JI. School playgrounds and physical activity policies as predictors of school and home time activity. *Int J Behav Nutr Phys Act*. 2011;8:38. doi:10.1186/1479-5868-8-38.
49. Treuth MS, Catellier DJ, Schmitz KH, Pate RR, Elder JP, McMurray RG et al. Weekend and weekday patterns of physical activity in overweight and normal-weight adolescent girls. *Obesity*. 2007;15(7):1782-8. doi:10.1038/oby.2007.212.

50. Trost SG, Pate RR, Freedson PS, Sallis JF, Taylor WC. Using objective physical activity measures with youth: How many days of monitoring are needed? *Med Sci Sports Exerc.* 2000;32(2):425-31. doi:10.1097/00005768-200002000-00025.
51. Uvacsek M, Toth M, Ridgers ND. Examining physical activity and inactivity in 9-12 years old children. *Acta Physiol Hung.* 2011;98(3):313-20. doi:10.1556/APhysiol.98.2011.3.8.
52. van Sluijs EMF, Fearne VA, Mattocks C, Riddoch C, Griffin SJ, Ness A. The contribution of active travel to children's physical activity levels: Cross-sectional results from the ALSPAC study. *Prev Med.* 2009;48(6):519-24. doi:10.1016/j.ypmed.2009.03.002.
53. Veitch J, Salmon J, Ball K. Individual, social and physical environmental correlates of children's active free-play: a cross-sectional study. *Int J Behav Nutr Phys Act.* 2010;7:11. doi:10.1186/1479-5868-7-11.
54. Wilkin TJ, Mallam KM, Metcalf BS, Jeffery AN, Voss LD. Variation in physical activity lies with the child, not his environment: Evidence for an 'activitystat' in young children (EarlyBird 16). *Int J Obes.* 2006;30(7):1050-5.
